# Supplementary material
Source: PubMed Central journal article supplement (PMC6535107)
Supplement: NIHMS1527318-supplement-supporting.pdf [file NIHMS1527318-supplement-supporting.pdf]

## Supporting Information for

### Targeted delivery of atorvastatin via asialoglycoprotein receptor (ASGPR)

*Youxi Zhang<sup>a,b#</sup>, Xinfu Zhang<sup>a,c#</sup>, Chunxi Zeng<sup>a</sup>, Bin Li<sup>a</sup>, Chengxiang Zhang<sup>a</sup>, Wenqing Li<sup>a</sup>,  
Xucheng Hou<sup>a</sup> and Yizhou Dong<sup>a,d,e,f,g,h</sup> \**

\*E-mail: dong.525@osu.edu.

*a*: Division of Pharmaceutics & Pharmaceutical Chemistry, College of Pharmacy, *d*:Department of Biomedical Engineering, *e*:The Center for Clinical and Translational Science, *f*: The Comprehensive Cancer Center, *g*: Dorothy M. Davis Heart & Lung Research Institute, and *h*: Department of Radiation Oncology, The Ohio State University, Columbus, Ohio 43210, United States.

*b*: Department of Pharmacy, The Fourth Affiliated Hospital of China Medical University, No. 4, Chongshan Eastern Road, Shenyang 110032, China.

*c*: State Key Laboratory of Fine Chemicals, Dalian University of Technology, Dalian 116024, China.

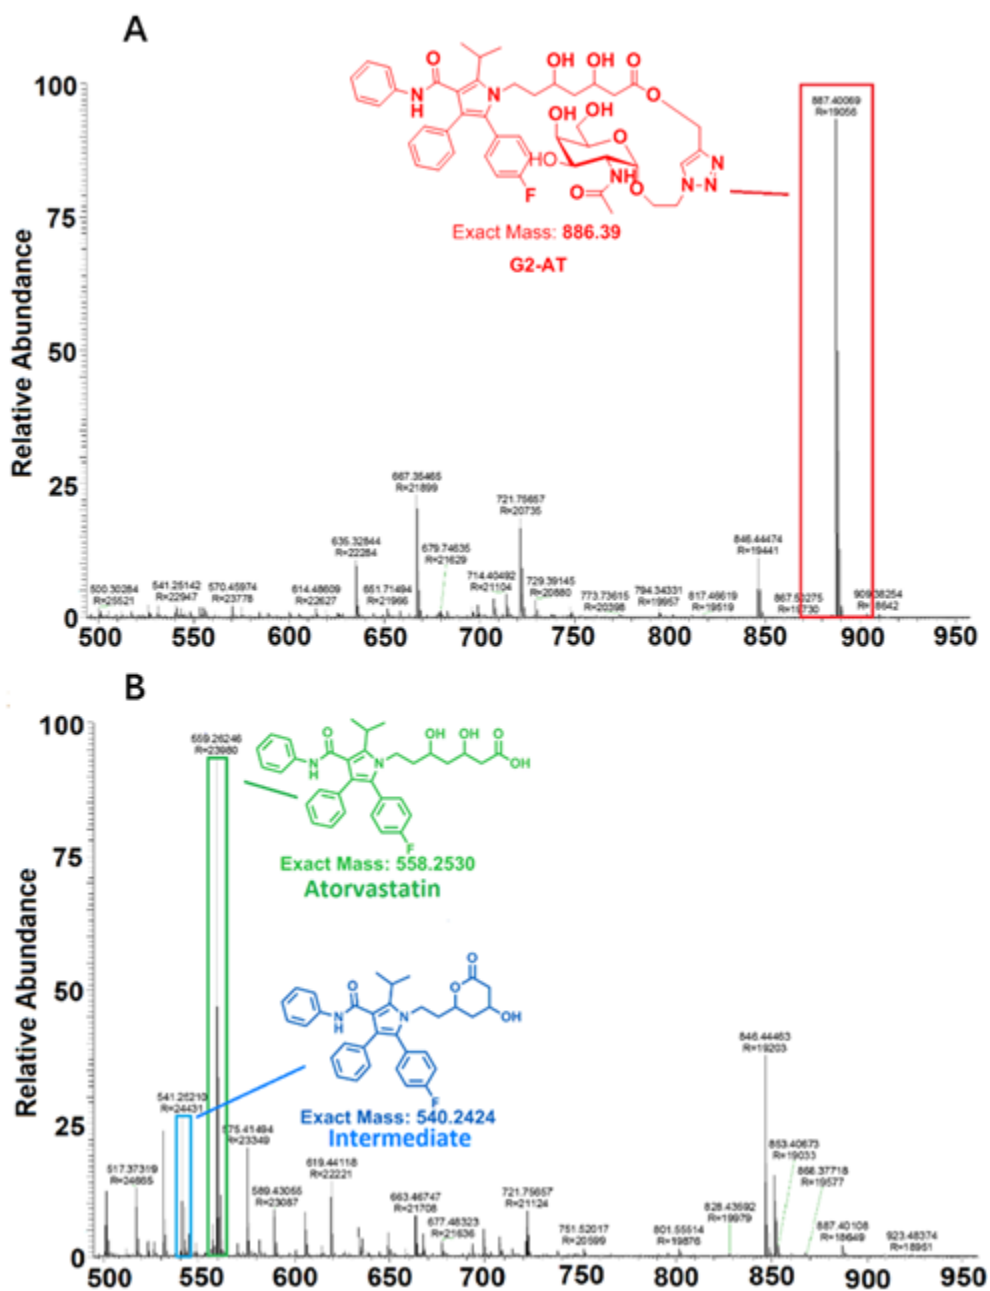

Figure S1. Mass spectra of hydrolysis products of G2-AT in PBS (pH 7.40) with esterase. (A) Before hydrolysis (B) 24h after hydrolysis.

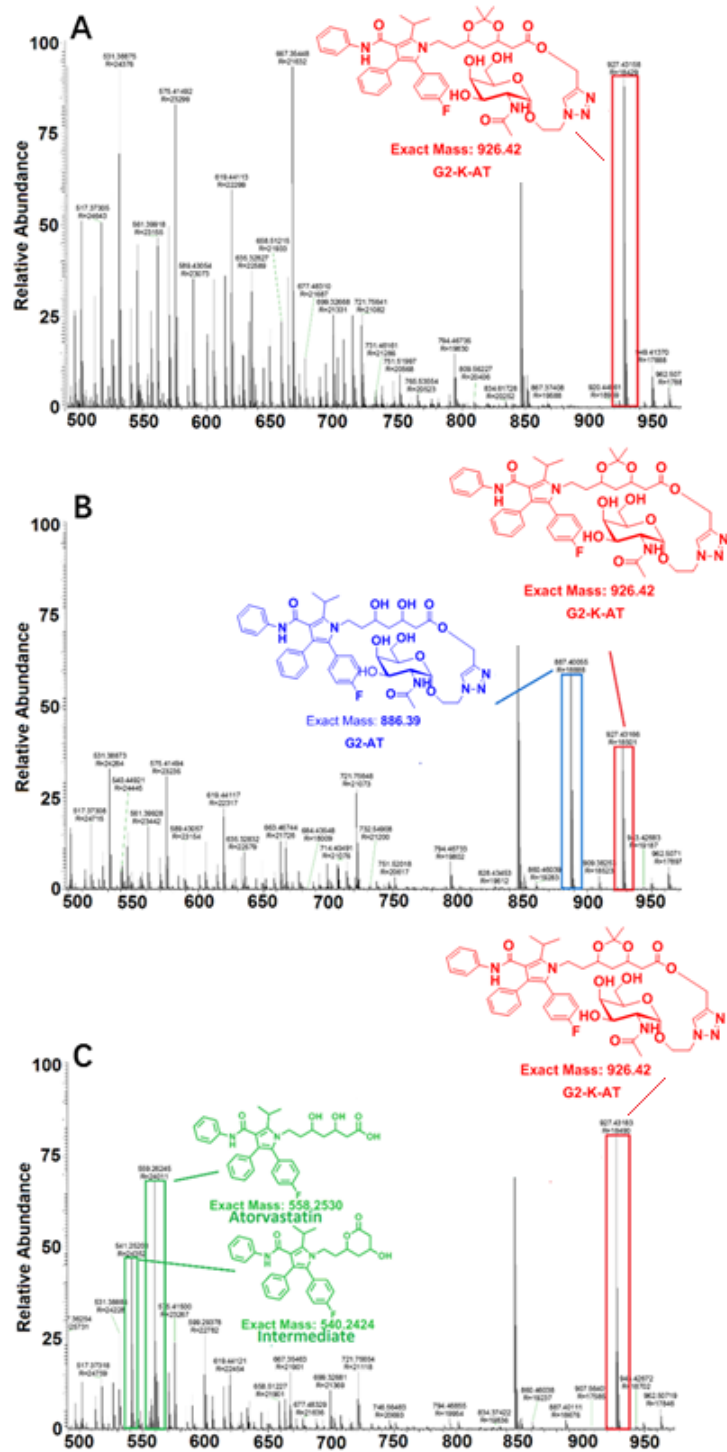

Figure S2. Mass spectra of hydrolysis products of G2-K-AT in PBS. (A) Before hydrolysis (B) 24h after hydrolysis in PBS (pH 4.50) (C) following 24h in PBS (pH 7.40) with esterase.

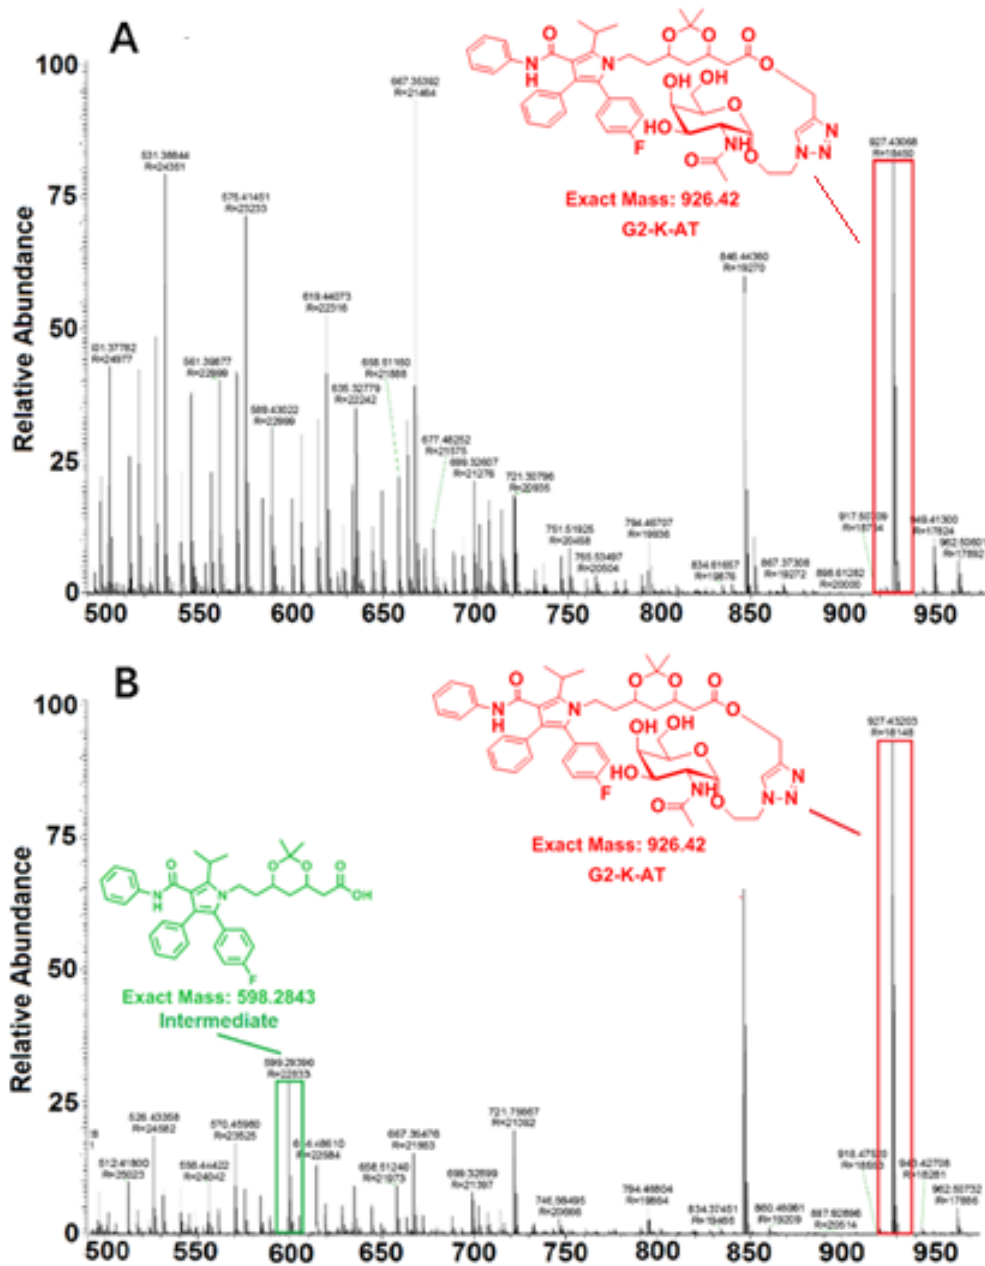

Figure S3. Mass spectra of hydrolysis products of G2-K-AT in PBS (pH 7.40) without esterase for 24 h. (A) Before hydrolysis (B) 24h after hydrolysis

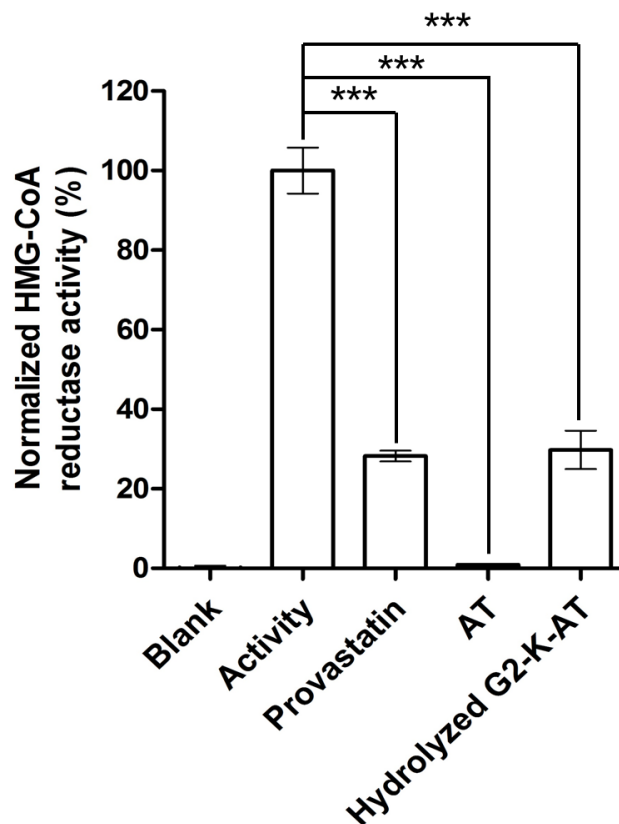

Figure S4. Inhibition of HMG-CoA reductase activity by atorvastatin and the hydrolysis product of G2-K-AT (Firstly, G2-K-AT was incubated in PBS (pH 4.50) for 72h, then mixture was incubated in PBS (pH 7.40, containing 1.0 mg/mL esterase) continuously for 24h.). (Triplicate; \*\*\*,  $P < 0.001$ ; t test, double-tailed.)

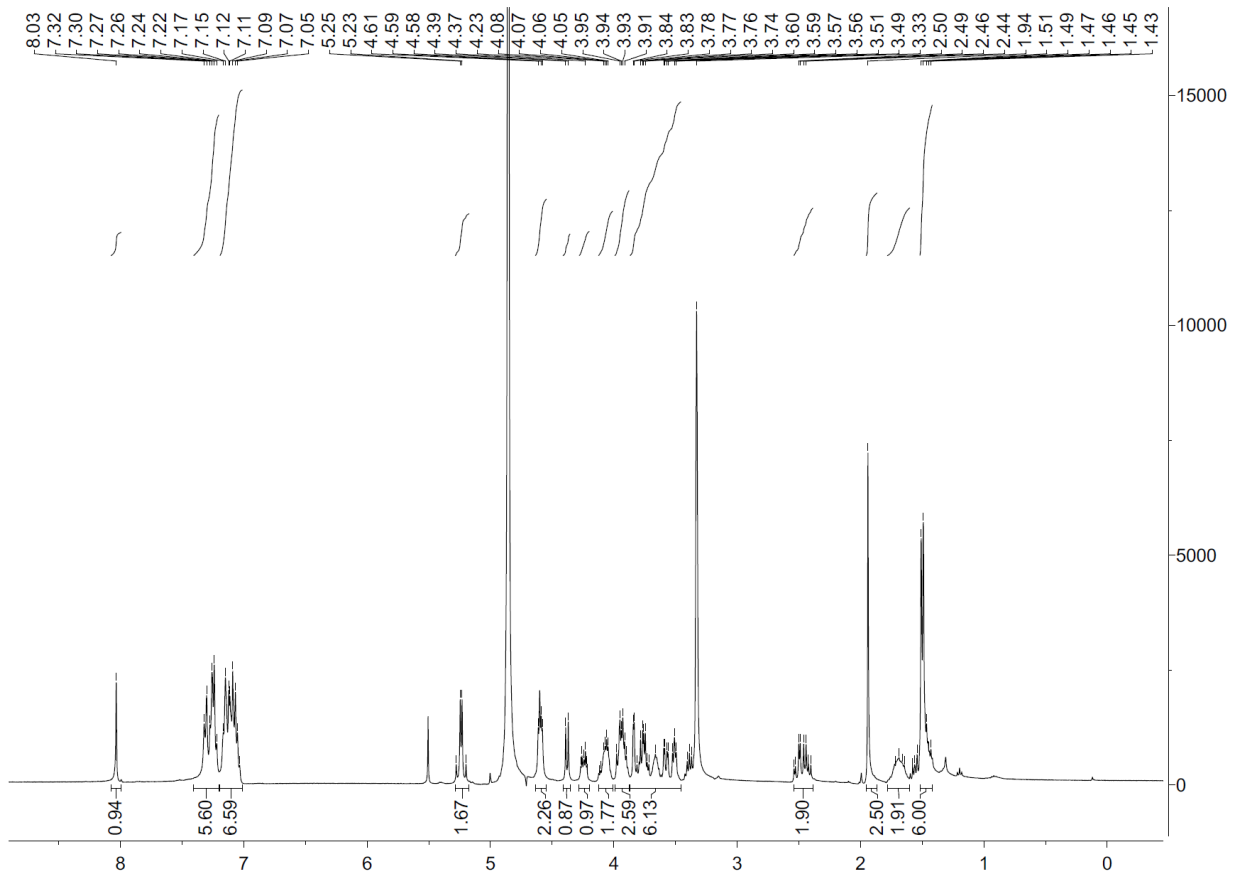

Figure S5.  $^1\text{H}$  NMR spectra of G2-AT.

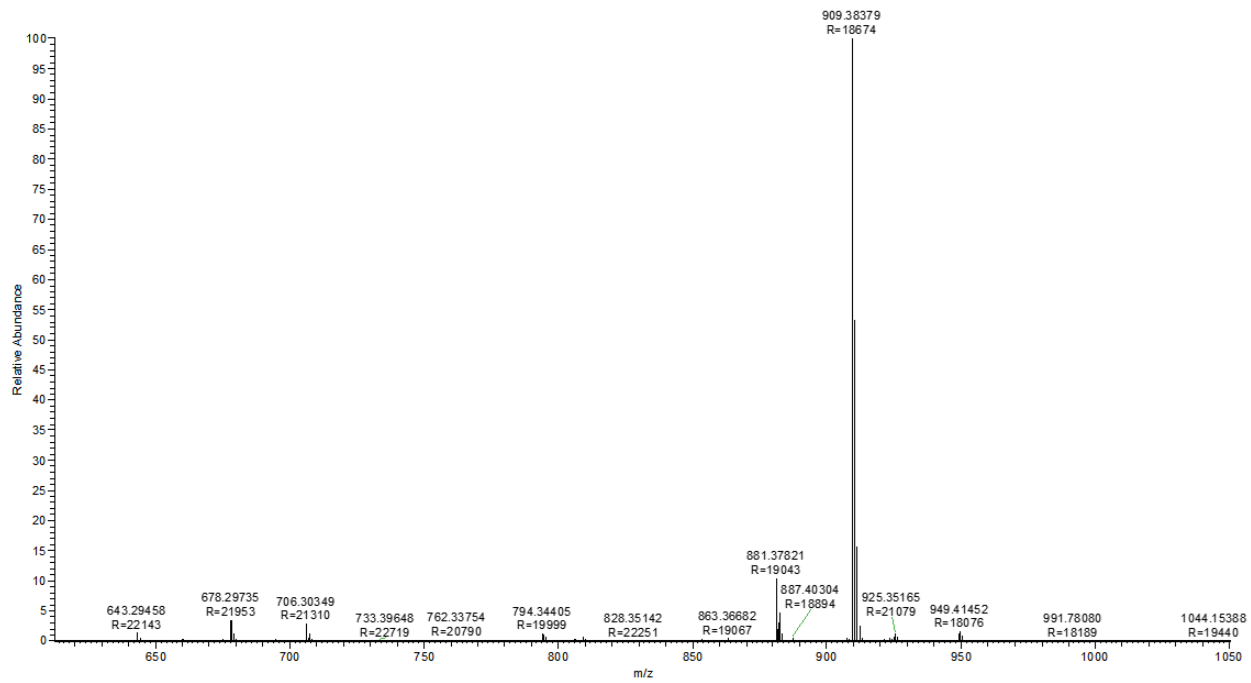

Figure S6. Mass spectra of G2-AT.

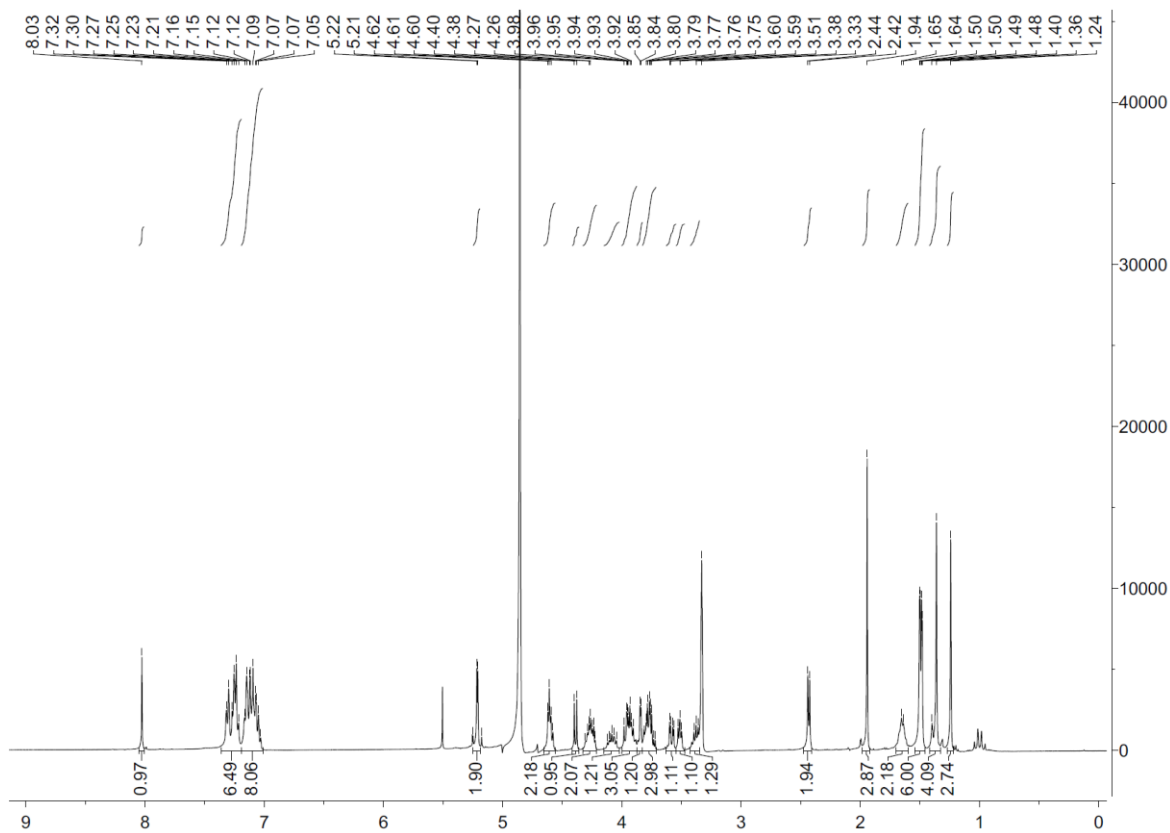

Figure S7.  $^1\text{H}$  NMR spectra of G2-K-AT.



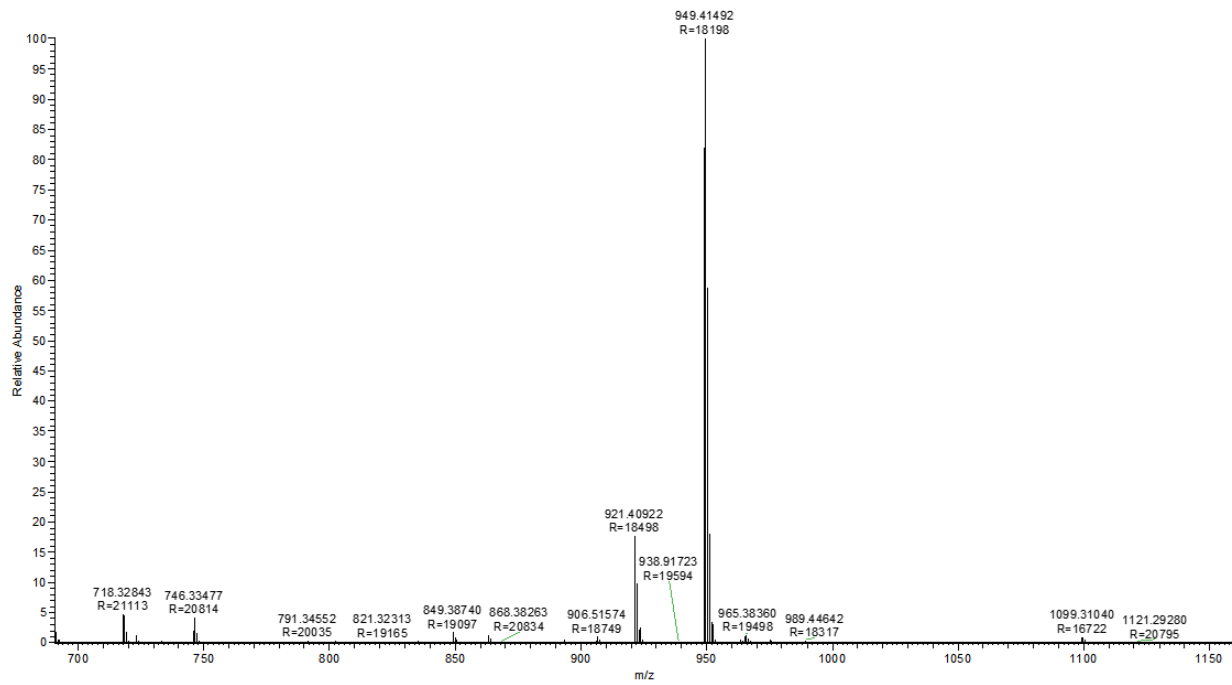

Figure S8. Mass spectra of G2-K-AT.
